# Supplementary material for: Construction of terpyridine–Ln(iii) coordination polymers: structural diversity, visible and NIR luminescence properties and response to nerve-agent mimics
Source: Royal Society of Chemistry journal article supplement (doi:10.1039/c3ce42091d), 2013-12-05
Supplement: c3ce42091d.pdf [file c3ce42091d.pdf]

# Construction of Terpyridine-Ln(III) Coordination Polymers: Structural Diversity, Visible and NIR Luminescence Properties and Response to Nerve-Agent Mimics

Sheng-Run Zheng,\* Rui-Ling Chen, Zi-Meng Liu, Xi-Ling Wen, Tao Xie, Jun Fan, Wei-Guang Zhang\*

## Supporting information

**Table S1** Crystallographic data and structure refinement summary for complexes **2-6, 8, 10** and **12**

| Complex                          | <b>2</b>                                                                        | <b>3</b>                                                                        | <b>4</b>                                                                        | <b>5</b>                                                                        |
|----------------------------------|---------------------------------------------------------------------------------|---------------------------------------------------------------------------------|---------------------------------------------------------------------------------|---------------------------------------------------------------------------------|
| Empirical formula                | C <sub>22</sub> H <sub>15</sub> N <sub>3</sub> O <sub>9</sub> S <sub>2</sub> Nd | C <sub>22</sub> H <sub>15</sub> N <sub>3</sub> O <sub>9</sub> S <sub>2</sub> Eu | C <sub>22</sub> H <sub>15</sub> N <sub>3</sub> O <sub>9</sub> S <sub>2</sub> Tb | C <sub>22</sub> H <sub>15</sub> N <sub>3</sub> O <sub>9</sub> S <sub>2</sub> Er |
| Formula weight                   | 673.73                                                                          | 681.45                                                                          | 688.41                                                                          | 696.75                                                                          |
| Crystal system                   | Monoclinic                                                                      | Monoclinic                                                                      | Monoclinic                                                                      | Monoclinic                                                                      |
| Space group                      | C2/c                                                                            | C2/c                                                                            | C2/c                                                                            | C2/c                                                                            |
| a / Å                            | 20.199(4)                                                                       | 20.1864(16)                                                                     | 20.084(4)                                                                       | 20.010(3)                                                                       |
| b / Å                            | 18.625(3)                                                                       | 18.5532(15)                                                                     | 18.534(4)                                                                       | 18.516(2)                                                                       |
| c / Å                            | 13.918(3)                                                                       | 13.8708(11)                                                                     | 13.831(4)                                                                       | 13.7905(18)                                                                     |
| α / °                            | 90                                                                              | 90                                                                              | 90                                                                              | 90                                                                              |
| β / °                            | 117.069(2)                                                                      | 117.3370(10)                                                                    | 117.639(2)                                                                      | 117.896(2)                                                                      |
| γ / °                            | 90                                                                              | 90                                                                              | 90                                                                              | 90                                                                              |
| V / Å <sup>3</sup>               | 4662.4(15)                                                                      | 4614.8(6)                                                                       | 4560.9(19)                                                                      | 4515.8(10)                                                                      |
| Z                                | 8                                                                               | 8                                                                               | 8                                                                               | 8                                                                               |
| D / g cm <sup>-3</sup>           | 1.920                                                                           | 1.962                                                                           | 2.005                                                                           | 2.047                                                                           |
| μ / mm <sup>-1</sup>             | 2.467                                                                           | 2.961                                                                           | 3.346                                                                           | 3.964                                                                           |
| T / K                            | 298(2)                                                                          | 298(2)                                                                          | 298(2)                                                                          | 298(2)                                                                          |
| R <sup>a</sup> / wR <sup>b</sup> | 0.0554 / 0.1211                                                                 | 0.0353 / 0.1093                                                                 | 0.0555 / 0.1529                                                                 | 0.0544 / 0.1336                                                                 |
| Total / unique / Rint            | 11776 / 4092 / 0.1121                                                           | 13490 / 5043 / 0.0297                                                           | 13456 / 4980 / 0.0832                                                           | 10984 / 4866 / 0.0716                                                           |

| Complex                          | 6                                                                               | 8                                                                                | 10                                                                               | 12                                                                               |
|----------------------------------|---------------------------------------------------------------------------------|----------------------------------------------------------------------------------|----------------------------------------------------------------------------------|----------------------------------------------------------------------------------|
| Empirical formula                | C <sub>22</sub> H <sub>15</sub> N <sub>3</sub> O <sub>9</sub> S <sub>2</sub> Yb | C <sub>22</sub> H <sub>23</sub> N <sub>3</sub> O <sub>13</sub> S <sub>2</sub> Yb | C <sub>25</sub> H <sub>29</sub> N <sub>3</sub> O <sub>15</sub> S <sub>2</sub> Yb | C <sub>25</sub> H <sub>19</sub> N <sub>3</sub> O <sub>10</sub> S <sub>2</sub> Dy |
| Formula weight                   | 702.53                                                                          | 774.59                                                                           | 849.60                                                                           | 748.05                                                                           |
| Crystal system                   | Monoclinic                                                                      | Monoclinic                                                                       | Monoclinic                                                                       | Triclinic                                                                        |
| Space group                      | <i>C2/c</i>                                                                     | <i>P2(1)/c</i>                                                                   | <i>C2/c</i>                                                                      | <i>P-1</i>                                                                       |
| a / Å                            | 19.952(7)                                                                       | 8.9698(6)                                                                        | 19.408(6)                                                                        | 10.744(3)                                                                        |
| b / Å                            | 18.500(6)                                                                       | 21.7582(15)                                                                      | 13.692(4)                                                                        | 11.964(3)                                                                        |
| c / Å                            | 13.756(5)                                                                       | 13.4973(10)                                                                      | 23.830(7)                                                                        | 12.004(6)                                                                        |
| α / °                            | 90                                                                              | 90                                                                               | 90                                                                               | 109.647(4)                                                                       |
| β / °                            | 117.935(4)                                                                      | 92.1640(10)                                                                      | 90.937(4)                                                                        | 103.175(4)                                                                       |
| γ / °                            | 90                                                                              | 90                                                                               | 90                                                                               | 109.375(3)                                                                       |
| V / Å <sup>3</sup>               | 4486(3)                                                                         | 2632.3(3)                                                                        | 6332(3)                                                                          | 1266.9(8)                                                                        |
| Z                                | 8                                                                               | 4                                                                                | 8                                                                                | 2                                                                                |
| D / g cm <sup>-3</sup>           | 2.080                                                                           | 1.955                                                                            | 1.781                                                                            | 1.961                                                                            |
| μ / mm <sup>-1</sup>             | 4.419                                                                           | 3.786                                                                            | 3.161                                                                            | 3.181                                                                            |
| T / K                            | 298(2)                                                                          | 298(2)                                                                           | 298(2)                                                                           | 298(2)                                                                           |
| R <sup>a</sup> / wR <sup>b</sup> | 0.0473 / 0.1197                                                                 | 0.0302 / 0.0792                                                                  | 0.0473 / 0.1245                                                                  | 0.0459 / 0.1222                                                                  |
| Total / unique / Rint            | 12818 / 4880 / 0.0640                                                           | 15346 / 5708 / 0.0310                                                            | 17817 / 6895 / 0.0551                                                            | 6367 / 4381 / 0.0293                                                             |

Table S2 Selected bond lengths [Å] and angles[°] for the complexes.<sup>a</sup>

| Complex 1            |            |                       |            |
|----------------------|------------|-----------------------|------------|
| Gd(1)-O(1W)          | 2.277(4)   | Gd(1)-O(1W)#1         | 2.297(4)   |
| Gd(1)-O(3W)          | 2.393(5)   | Gd(1)-O(2W)           | 2.430(5)   |
| Gd(1)-O(4)           | 2.461(4)   | Gd(1)-N(1)#2          | 2.527(6)   |
| Gd(1)-N(3)#2         | 2.594(5)   | Gd(1)-N(2)#2          | 2.596(5)   |
| Gd(1)-Gd(1)#1        | 3.8023(6)  |                       |            |
| O(1W)-Gd(1)-O(1W)#1  | 67.54(16)  | O(1W)-Gd(1)-O(3W)     | 102.79(16) |
| O(1W)#1-Gd(1)-O(3W)  | 81.48(17)  | O(1W)-Gd(1)-O(2W)     | 141.10(15) |
| O(1W)#1-Gd(1)-O(2W)  | 74.74(16)  | O(3W)-Gd(1)-O(2W)     | 80.1(2)    |
| O(1W)-Gd(1)-O(4)     | 148.25(14) | O(1W)#1-Gd(1)-O(4)    | 144.10(14) |
| O(3W)-Gd(1)-O(4)     | 84.90(15)  | O(2W)-Gd(1)-O(4)      | 70.27(15)  |
| O(1W)-Gd(1)-N(1)#2   | 90.79(17)  | O(1W)#1-Gd(1)-N(1)#2  | 85.97(17)  |
| O(3W)-Gd(1)-N(1)#2   | 156.23(17) | O(2W)-Gd(1)-N(1)#2    | 77.1(2)    |
| O(4)-Gd(1)-N(1)#2    | 93.78(17)  | O(1W)-Gd(1)-N(3)#2    | 78.01(15)  |
| O(1W)#1-Gd(1)-N(3)#2 | 133.56(15) | O(3W)-Gd(1)-N(3)#2    | 76.70(16)  |
| O(2W)-Gd(1)-N(3)#2   | 138.57(15) | O(4)-Gd(1)-N(3)#2     | 73.86(15)  |
| N(1)#2-Gd(1)-N(3)#2  | 125.76(16) | O(1W)-Gd(1)-N(2)#2    | 84.56(15)  |
| O(1W)#1-Gd(1)-N(2)#2 | 138.51(14) | O(3W)-Gd(1)-N(2)#2    | 136.35(16) |
| O(2W)-Gd(1)-N(2)#2   | 120.3(2)   | O(4)-Gd(1)-N(2)#2     | 69.66(14)  |
| N(1)#2-Gd(1)-N(2)#2  | 63.51(16)  | N(3)#2-Gd(1)-N(2)#2   | 62.68(15)  |
| O(1W)-Gd(1)-Gd(1)#1  | 33.94(10)  | O(1W)#1-Gd(1)-Gd(1)#1 | 33.60(10)  |
| O(3W)-Gd(1)-Gd(1)#1  | 92.47(11)  | O(2W)-Gd(1)-Gd(1)#1   | 107.88(12) |
| O(4)-Gd(1)-Gd(1)#1   | 176.99(10) | N(1)#2-Gd(1)-Gd(1)#1  | 88.04(13)  |
| N(3)#2-Gd(1)-Gd(1)#1 | 106.98(10) | N(2)#2-Gd(1)-Gd(1)#1  | 113.32(10) |
| Complex 2            |            |                       |            |
| Nd(1)-O(3)#1         | 2.421(7)   | Nd(1)-O(8)#2          | 2.443(9)   |
| Nd(1)-O(7)           | 2.444(8)   | Nd(1)-O(5)#3          | 2.485(7)   |
| Nd(1)-O(4)#4         | 2.523(8)   | Nd(1)-N(3)            | 2.539(9)   |
| Nd(1)-N(1)           | 2.540(10)  | Nd(1)-N(2)            | 2.597(8)   |
| O(3)#1-Nd(1)-O(8)#2  | 75.4(3)    | O(3)#1-Nd(1)-O(7)     | 73.9(3)    |

|                     |          |                     |          |
|---------------------|----------|---------------------|----------|
| O(8)#2-Nd(1)-O(7)   | 68.3(3)  | O(3)#1-Nd(1)-O(5)#3 | 142.9(3) |
| O(8)#2-Nd(1)-O(5)#3 | 80.2(3)  | O(7)-Nd(1)-O(5)#3   | 71.2(3)  |
| O(3)#1-Nd(1)-O(4)#4 | 140.8(2) | O(8)#2-Nd(1)-O(4)#4 | 130.6(3) |
| O(7)-Nd(1)-O(4)#4   | 138.1(3) | O(5)#3-Nd(1)-O(4)#4 | 76.1(2)  |
| O(3)#1-Nd(1)-N(3)   | 75.7(3)  | O(8)#2-Nd(1)-N(3)   | 83.2(3)  |
| O(7)-Nd(1)-N(3)     | 142.5(3) | O(5)#3-Nd(1)-N(3)   | 128.7(3) |
| O(4)#4-Nd(1)-N(3)   | 79.1(3)  | O(3)#1-Nd(1)-N(1)   | 89.0(3)  |
| O(8)#2-Nd(1)-N(1)   | 141.9(3) | O(7)-Nd(1)-N(1)     | 74.1(3)  |
| O(5)#3-Nd(1)-N(1)   | 93.5(3)  | O(4)#4-Nd(1)-N(1)   | 82.7(3)  |
| N(3)-Nd(1)-N(1)     | 126.8(3) | O(3)#1-Nd(1)-N(2)   | 75.0(3)  |
| O(8)#2-Nd(1)-N(2)   | 140.2(3) | O(7)-Nd(1)-N(2)     | 126.3(3) |
| O(5)#3-Nd(1)-N(2)   | 137.8(3) | O(4)#4-Nd(1)-N(2)   | 67.2(2)  |
| N(3)-Nd(1)-N(2)     | 64.2(3)  | N(1)-Nd(1)-N(2)     | 62.7(3)  |

### Complex 3

|                      |            |                      |            |
|----------------------|------------|----------------------|------------|
| Eu(1)-O(3)#1         | 2.357(4)   | Eu(1)-O(8)#2         | 2.405(4)   |
| Eu(1)-O(7)           | 2.414(4)   | Eu(1)-O(5)#3         | 2.427(4)   |
| Eu(1)-O(4)#4         | 2.452(3)   | Eu(1)-N(3)           | 2.502(4)   |
| Eu(1)-N(1)           | 2.518(5)   | Eu(1)-N(2)           | 2.551(4)   |
| Eu(1)-C(22)#2        | 3.202(5)   | Eu(1)-C(22)          | 3.228(5)   |
| Eu(1)-S(2)#3         | 3.4502(12) |                      |            |
| O(3)#1-Eu(1)-O(8)#2  | 76.49(14)  | O(3)#1-Eu(1)-O(7)    | 74.29(14)  |
| O(8)#2-Eu(1)-O(7)    | 67.78(13)  | O(3)#1-Eu(1)-O(5)#3  | 144.25(13) |
| O(8)#2-Eu(1)-O(5)#3  | 78.00(14)  | O(7)-Eu(1)-O(5)#3    | 73.08(14)  |
| O(3)#1-Eu(1)-O(4)#4  | 141.88(12) | O(8)#2-Eu(1)-O(4)#4  | 129.18(12) |
| O(7)-Eu(1)-O(4)#4    | 137.28(13) | O(5)#3-Eu(1)-O(4)#4  | 73.82(12)  |
| O(3)#1-Eu(1)-N(3)    | 77.25(16)  | O(8)#2-Eu(1)-N(3)    | 82.48(13)  |
| O(7)-Eu(1)-N(3)      | 142.64(13) | O(5)#3-Eu(1)-N(3)    | 123.47(15) |
| O(4)#4-Eu(1)-N(3)    | 79.16(13)  | O(3)#1-Eu(1)-N(1)    | 89.26(17)  |
| O(8)#2-Eu(1)-N(1)    | 142.34(14) | O(7)-Eu(1)-N(1)      | 74.87(14)  |
| O(5)#3-Eu(1)-N(1)    | 95.97(16)  | O(4)#4-Eu(1)-N(1)    | 82.55(14)  |
| N(3)-Eu(1)-N(1)      | 128.59(13) | O(3)#1-Eu(1)-N(2)    | 75.18(12)  |
| O(8)#2-Eu(1)-N(2)    | 140.26(14) | O(7)-Eu(1)-N(2)      | 128.35(13) |
| O(5)#3-Eu(1)-N(2)    | 138.28(13) | O(4)#4-Eu(1)-N(2)    | 67.73(11)  |
| N(3)-Eu(1)-N(2)      | 64.51(13)  | N(1)-Eu(1)-N(2)      | 64.09(13)  |
| O(3)#1-Eu(1)-C(22)#2 | 71.66(13)  | O(8)#2-Eu(1)-C(22)#2 | 20.10(14)  |
| O(7)-Eu(1)-C(22)#2   | 47.77(13)  | O(5)#3-Eu(1)-C(22)#2 | 75.76(13)  |
| O(4)#4-Eu(1)-C(22)#2 | 142.47(12) | N(3)-Eu(1)-C(22)#2   | 100.25(13) |
| N(1)-Eu(1)-C(22)#2   | 122.26(14) | N(2)-Eu(1)-C(22)#2   | 145.95(12) |
| O(3)#1-Eu(1)-C(22)   | 70.60(13)  | O(8)#2-Eu(1)-C(22)   | 48.10(14)  |
| O(7)-Eu(1)-C(22)     | 19.78(14)  | O(5)#3-Eu(1)-C(22)   | 73.75(13)  |
| O(4)#4-Eu(1)-C(22)   | 146.89(12) | N(3)-Eu(1)-C(22)     | 125.37(13) |
| N(1)-Eu(1)-C(22)     | 94.35(14)  | N(2)-Eu(1)-C(22)     | 139.62(12) |
| C(22)#2-Eu(1)-C(22)  | 28.03(19)  | O(3)#1-Eu(1)-S(2)#3  | 151.29(10) |
| O(8)#2-Eu(1)-S(2)#3  | 75.10(10)  | O(7)-Eu(1)-S(2)#3    | 91.13(9)   |
| O(5)#3-Eu(1)-S(2)#3  | 20.70(11)  | O(4)#4-Eu(1)-S(2)#3  | 63.76(8)   |
| N(3)-Eu(1)-S(2)#3    | 102.90(9)  | N(1)-Eu(1)-S(2)#3    | 111.04(11) |
| N(2)-Eu(1)-S(2)#3    | 131.41(9)  | C(22)#2-Eu(1)-S(2)#3 | 80.20(9)   |
| C(22)-Eu(1)-S(2)#3   | 87.25(9)   |                      |            |

### Complex 4

|                     |           |                     |           |
|---------------------|-----------|---------------------|-----------|
| Tb(1)-O(3)#1        | 2.322(8)  | Tb(1)-O(8)#2        | 2.379(9)  |
| Tb(1)-O(7)          | 2.388(8)  | Tb(1)-O(5)#3        | 2.396(9)  |
| Tb(1)-O(4)#4        | 2.409(8)  | Tb(1)-N(3)          | 2.462(10) |
| Tb(1)-N(1)          | 2.491(10) | Tb(1)-N(2)          | 2.514(9)  |
| O(3)#1-Tb(1)-O(8)#2 | 76.3(3)   | O(3)#1-Tb(1)-O(7)   | 74.7(3)   |
| O(8)#2-Tb(1)-O(7)   | 68.1(3)   | O(3)#1-Tb(1)-O(5)#3 | 144.4(3)  |
| O(8)#2-Tb(1)-O(5)#3 | 77.2(3)   | O(7)-Tb(1)-O(5)#3   | 73.5(3)   |

|                     |          |                     |          |
|---------------------|----------|---------------------|----------|
| O(3)#1-Tb(1)-O(4)#4 | 142.1(3) | O(8)#2-Tb(1)-O(4)#4 | 128.8(3) |
| O(7)-Tb(1)-O(4)#4   | 137.0(3) | O(5)#3-Tb(1)-O(4)#4 | 73.5(3)  |
| O(3)#1-Tb(1)-N(3)   | 77.7(3)  | O(8)#2-Tb(1)-N(3)   | 81.3(3)  |
| O(7)-Tb(1)-N(3)     | 142.6(3) | O(5)#3-Tb(1)-N(3)   | 121.0(3) |
| O(4)#4-Tb(1)-N(3)   | 79.1(3)  | O(3)#1-Tb(1)-N(1)   | 90.0(4)  |
| O(8)#2-Tb(1)-N(1)   | 142.8(3) | O(7)-Tb(1)-N(1)     | 75.0(3)  |
| O(5)#3-Tb(1)-N(1)   | 97.0(3)  | O(4)#4-Tb(1)-N(1)   | 82.3(3)  |
| N(3)-Tb(1)-N(1)     | 129.9(3) | O(3)#1-Tb(1)-N(2)   | 75.1(3)  |
| O(8)#2-Tb(1)-N(2)   | 139.5(3) | O(7)-Tb(1)-N(2)     | 128.9(3) |
| O(5)#3-Tb(1)-N(2)   | 139.0(3) | O(4)#4-Tb(1)-N(2)   | 68.0(3)  |
| N(3)-Tb(1)-N(2)     | 65.1(3)  | N(1)-Tb(1)-N(2)     | 64.8(3)  |

#### Complex 5

|                     |          |                     |          |
|---------------------|----------|---------------------|----------|
| Er(1)-O(3)#1        | 2.291(6) | Er(1)-O(7)          | 2.352(6) |
| Er(1)-O(5)#2        | 2.358(6) | Er(1)-O(8)#3        | 2.360(6) |
| Er(1)-O(4)#4        | 2.389(6) | Er(1)-N(1)          | 2.447(9) |
| Er(1)-N(3)          | 2.447(8) | Er(1)-N(2)          | 2.487(7) |
| O(3)#1-Er(1)-O(7)   | 75.0(2)  | O(3)#1-Er(1)-O(5)#2 | 145.1(2) |
| O(7)-Er(1)-O(5)#2   | 74.5(2)  | O(3)#1-Er(1)-O(8)#3 | 77.6(2)  |
| O(7)-Er(1)-O(8)#3   | 68.9(2)  | O(5)#2-Er(1)-O(8)#3 | 76.0(2)  |
| O(3)#1-Er(1)-O(4)#4 | 142.7(2) | O(7)-Er(1)-O(4)#4   | 136.0(2) |
| O(5)#2-Er(1)-O(4)#4 | 72.1(2)  | O(8)#3-Er(1)-O(4)#4 | 127.4(2) |
| O(3)#1-Er(1)-N(1)   | 90.0(3)  | O(7)-Er(1)-N(1)     | 74.7(2)  |
| O(5)#2-Er(1)-N(1)   | 97.8(3)  | O(8)#3-Er(1)-N(1)   | 143.4(3) |
| O(4)#4-Er(1)-N(1)   | 82.2(2)  | O(3)#1-Er(1)-N(3)   | 79.3(3)  |
| O(7)-Er(1)-N(3)     | 143.1(2) | O(5)#2-Er(1)-N(3)   | 117.7(2) |
| O(8)#3-Er(1)-N(3)   | 80.2(2)  | O(4)#4-Er(1)-N(3)   | 79.1(2)  |
| N(1)-Er(1)-N(3)     | 131.6(3) | O(3)#1-Er(1)-N(2)   | 75.1(2)  |
| O(7)-Er(1)-N(2)     | 129.7(2) | O(5)#2-Er(1)-N(2)   | 138.8(2) |
| O(8)#3-Er(1)-N(2)   | 139.5(2) | O(4)#4-Er(1)-N(2)   | 68.5(2)  |
| N(1)-Er(1)-N(2)     | 65.9(3)  | N(3)-Er(1)-N(2)     | 65.7(3)  |

#### Complex 6

|                      |            |                      |           |
|----------------------|------------|----------------------|-----------|
| Yb(1)-O(3)#1         | 2.255(6)   | Yb(1)-O(5)#2         | 2.341(5)  |
| Yb(1)-O(8)#3         | 2.343(6)   | Yb(1)-O(7)           | 2.348(5)  |
| Yb(1)-O(4)#4         | 2.374(5)   | Yb(1)-N(1)           | 2.432(7)  |
| Yb(1)-N(3)           | 2.442(7)   | Yb(1)-N(2)           | 2.450(6)  |
| Yb(1)-C(22)#3        | 3.141(9)   | Yb(1)-C(22)          | 3.149(8)  |
| O(3)#1-Yb(1)-O(5)#2  | 145.9(2)   | O(3)#1-Yb(1)-O(8)#3  | 77.7(2)   |
| O(5)#2-Yb(1)-O(8)#3  | 76.1(2)    | O(3)#1-Yb(1)-O(7)    | 76.1(2)   |
| O(5)#2-Yb(1)-O(7)    | 74.4(2)    | O(8)#3-Yb(1)-O(7)    | 69.34(19) |
| O(3)#1-Yb(1)-O(4)#4  | 142.20(18) | O(5)#2-Yb(1)-O(4)#4  | 71.91(18) |
| O(8)#3-Yb(1)-O(4)#4  | 127.27(18) | O(7)-Yb(1)-O(4)#4    | 135.5(2)  |
| O(3)#1-Yb(1)-N(1)    | 90.8(2)    | O(5)#2-Yb(1)-N(1)    | 97.6(2)   |
| O(8)#3-Yb(1)-N(1)    | 143.8(2)   | O(7)-Yb(1)-N(1)      | 74.6(2)   |
| O(4)#4-Yb(1)-N(1)    | 81.9(2)    | O(3)#1-Yb(1)-N(3)    | 78.9(2)   |
| O(5)#2-Yb(1)-N(3)    | 116.8(2)   | O(8)#3-Yb(1)-N(3)    | 79.5(2)   |
| O(7)-Yb(1)-N(3)      | 143.4(2)   | O(4)#4-Yb(1)-N(3)    | 79.1(2)   |
| N(1)-Yb(1)-N(3)      | 132.3(2)   | O(3)#1-Yb(1)-N(2)    | 74.8(2)   |
| O(5)#2-Yb(1)-N(2)    | 138.5(2)   | O(8)#3-Yb(1)-N(2)    | 139.5(2)  |
| O(7)-Yb(1)-N(2)      | 129.73(19) | O(4)#4-Yb(1)-N(2)    | 68.35(19) |
| N(1)-Yb(1)-N(2)      | 65.8(2)    | N(3)-Yb(1)-N(2)      | 66.5(2)   |
| O(3)#1-Yb(1)-C(22)#3 | 73.5(2)    | O(5)#2-Yb(1)-C(22)#3 | 74.3(2)   |
| O(8)#3-Yb(1)-C(22)#3 | 20.6(2)    | O(7)-Yb(1)-C(22)#3   | 48.8(2)   |
| O(4)#4-Yb(1)-C(22)#3 | 140.21(19) | N(1)-Yb(1)-C(22)#3   | 123.2(2)  |
| N(3)-Yb(1)-C(22)#3   | 98.4(2)    | N(2)-Yb(1)-C(22)#3   | 147.0(2)  |
| O(3)#1-Yb(1)-C(22)   | 73.1(2)    | O(5)#2-Yb(1)-C(22)   | 73.3(2)   |
| O(8)#3-Yb(1)-C(22)   | 49.0(2)    | O(7)-Yb(1)-C(22)     | 20.3(2)   |

|                     |          |                    |          |
|---------------------|----------|--------------------|----------|
| O(4)#4-Yb(1)-C(22)  | 144.2(2) | N(1)-Yb(1)-C(22)   | 94.8(2)  |
| N(3)-Yb(1)-C(22)    | 125.0(2) | N(2)-Yb(1)-C(22)   | 142.0(2) |
| C(22)#3-Yb(1)-C(22) | 28.5(3)  | O(5)#2-Yb(1)-C(22) |          |

Complex 7

|                     |            |                     |            |
|---------------------|------------|---------------------|------------|
| Lu(1)-O(3)#1        | 2.252(5)   | Lu(1)-O(8)#2        | 2.327(6)   |
| Lu(1)-O(5)#3        | 2.335(5)   | Lu(1)-O(7)          | 2.337(5)   |
| Lu(1)-O(4)#4        | 2.361(5)   | Lu(1)-N(3)          | 2.423(6)   |
| Lu(1)-N(1)          | 2.436(7)   | Lu(1)-N(2)          | 2.442(6)   |
| O(3)#1-Lu(1)-O(8)#2 | 77.6(2)    | O(3)#1-Lu(1)-O(5)#3 | 145.8(2)   |
| O(8)#2-Lu(1)-O(5)#3 | 76.1(2)    | O(3)#1-Lu(1)-O(7)   | 76.2(2)    |
| O(8)#2-Lu(1)-O(7)   | 69.86(19)  | O(5)#3-Lu(1)-O(7)   | 74.46(19)  |
| O(3)#1-Lu(1)-O(4)#4 | 142.13(19) | O(8)#2-Lu(1)-O(4)#4 | 127.00(19) |
| O(5)#3-Lu(1)-O(4)#4 | 72.02(18)  | O(7)-Lu(1)-O(4)#4   | 135.57(18) |
| O(3)#1-Lu(1)-N(3)   | 79.2(2)    | O(8)#2-Lu(1)-N(3)   | 78.9(2)    |
| O(5)#3-Lu(1)-N(3)   | 116.3(2)   | O(7)-Lu(1)-N(3)     | 143.5(2)   |
| O(4)#4-Lu(1)-N(3)   | 78.7(2)    | O(3)#1-Lu(1)-N(1)   | 91.0(2)    |
| O(8)#2-Lu(1)-N(1)   | 143.4(2)   | O(5)#3-Lu(1)-N(1)   | 97.2(2)    |
| O(7)-Lu(1)-N(1)     | 73.7(2)    | O(4)#4-Lu(1)-N(1)   | 82.4(2)    |
| N(3)-Lu(1)-N(1)     | 133.4(2)   | O(3)#1-Lu(1)-N(2)   | 74.8(2)    |
| O(8)#2-Lu(1)-N(2)   | 139.1(2)   | O(5)#3-Lu(1)-N(2)   | 138.7(2)   |
| O(7)-Lu(1)-N(2)     | 129.8(2)   | O(4)#4-Lu(1)-N(2)   | 68.31(19)  |
| N(3)-Lu(1)-N(2)     | 66.7(2)    | N(1)-Lu(1)-N(2)     | 66.8(2)    |

Complex 8

|                      |            |                      |            |
|----------------------|------------|----------------------|------------|
| Yb(1)-O(6)#1         | 2.269(3)   | Yb(1)-O(8)#2         | 2.295(3)   |
| Yb(1)-O(1W)          | 2.304(3)   | Yb(1)-O(2)#3         | 2.309(3)   |
| Yb(1)-O(7)           | 2.329(3)   | Yb(1)-N(1)           | 2.456(3)   |
| Yb(1)-N(2)           | 2.461(3)   | Yb(1)-N(3)           | 2.483(3)   |
| Yb(1)-C(22)#2        | 3.091(4)   | Yb(1)-C(22)          | 3.119(4)   |
| O(6)#1-Yb(1)-O(8)#2  | 84.09(10)  | O(6)#1-Yb(1)-O(1W)   | 79.77(11)  |
| O(8)#2-Yb(1)-O(1W)   | 141.09(10) | O(6)#1-Yb(1)-O(2)#3  | 102.15(11) |
| O(8)#2-Yb(1)-O(2)#3  | 147.14(10) | O(1W)-Yb(1)-O(2)#3   | 71.38(11)  |
| O(6)#1-Yb(1)-O(7)    | 80.05(11)  | O(8)#2-Yb(1)-O(7)    | 70.42(9)   |
| O(1W)-Yb(1)-O(7)     | 72.04(11)  | O(2)#3-Yb(1)-O(7)    | 142.27(10) |
| O(6)#1-Yb(1)-N(1)    | 152.40(12) | O(8)#2-Yb(1)-N(1)    | 97.11(11)  |
| O(1W)-Yb(1)-N(1)     | 82.34(12)  | O(2)#3-Yb(1)-N(1)    | 91.75(12)  |
| O(7)-Yb(1)-N(1)      | 74.51(11)  | O(6)#1-Yb(1)-N(2)    | 138.92(11) |
| O(8)#2-Yb(1)-N(2)    | 72.00(11)  | O(1W)-Yb(1)-N(2)     | 138.43(12) |
| O(2)#3-Yb(1)-N(2)    | 83.18(11)  | O(7)-Yb(1)-N(2)      | 120.00(11) |
| N(1)-Yb(1)-N(2)      | 65.78(11)  | O(6)#1-Yb(1)-N(3)    | 76.56(11)  |
| O(8)#2-Yb(1)-N(3)    | 76.35(11)  | O(1W)-Yb(1)-N(3)     | 132.25(11) |
| O(2)#3-Yb(1)-N(3)    | 73.94(11)  | O(7)-Yb(1)-N(3)      | 140.90(11) |
| N(1)-Yb(1)-N(3)      | 130.66(11) | N(2)-Yb(1)-N(3)      | 65.76(11)  |
| O(6)#1-Yb(1)-C(22)#2 | 80.50(10)  | O(8)#2-Yb(1)-C(22)#2 | 20.66(9)   |
| O(1W)-Yb(1)-C(22)#2  | 120.81(11) | O(2)#3-Yb(1)-C(22)#2 | 167.77(10) |
| O(7)-Yb(1)-C(22)#2   | 49.79(10)  | N(1)-Yb(1)-C(22)#2   | 90.95(11)  |
| N(2)-Yb(1)-C(22)#2   | 87.07(11)  | N(3)-Yb(1)-C(22)#2   | 95.34(11)  |
| O(6)#1-Yb(1)-C(22)   | 78.51(10)  | O(8)#2-Yb(1)-C(22)   | 49.60(9)   |
| O(1W)-Yb(1)-C(22)    | 92.34(11)  | O(2)#3-Yb(1)-C(22)   | 163.13(10) |
| O(7)-Yb(1)-C(22)     | 20.86(9)   | N(1)-Yb(1)-C(22)     | 81.41(11)  |
| N(2)-Yb(1)-C(22)     | 107.59(11) | N(3)-Yb(1)-C(22)     | 122.05(11) |
| C(22)#2-Yb(1)-C(22)  | 28.94(13)  |                      |            |

Complex 9

|              |          |              |          |
|--------------|----------|--------------|----------|
| Lu(1)-O(6)#1 | 2.265(5) | Lu(1)-O(8)#2 | 2.284(6) |
| Lu(1)-O(1W)  | 2.297(6) | Lu(1)-O(7)   | 2.327(6) |
| Lu(1)-O(2)#3 | 2.324(6) | Lu(1)-N(1)   | 2.456(7) |

|                     |            |                     |           |
|---------------------|------------|---------------------|-----------|
| Lu(1)-N(2)          | 2.467(6)   | Lu(1)-N(3)          | 2.498(7)  |
| O(6)#1-Lu(1)-O(8)#2 | 84.4(2)    | O(6)#1-Lu(1)-O(1W)  | 79.8(2)   |
| O(8)#2-Lu(1)-O(1W)  | 141.3(2)   | O(6)#1-Lu(1)-O(7)   | 79.74(19) |
| O(8)#2-Lu(1)-O(7)   | 70.62(19)  | O(1W)-Lu(1)-O(7)    | 71.9(2)   |
| O(6)#1-Lu(1)-O(2)#3 | 102.42(19) | O(8)#2-Lu(1)-O(2)#3 | 146.9(2)  |
| O(1W)-Lu(1)-O(2)#3  | 71.4(2)    | O(7)-Lu(1)-O(2)#3   | 142.2(2)  |
| O(6)#1-Lu(1)-N(1)   | 152.2(2)   | O(8)#2-Lu(1)-N(1)   | 96.9(2)   |
| O(1W)-Lu(1)-N(1)    | 82.2(2)    | O(7)-Lu(1)-N(1)     | 74.6(2)   |
| O(2)#3-Lu(1)-N(1)   | 91.6(2)    | O(6)#1-Lu(1)-N(2)   | 139.2(2)  |
| O(8)#2-Lu(1)-N(2)   | 71.6(2)    | O(1W)-Lu(1)-N(2)    | 138.3(2)  |
| O(7)-Lu(1)-N(2)     | 119.9(2)   | O(2)#3-Lu(1)-N(2)   | 83.2(2)   |
| N(1)-Lu(1)-N(2)     | 65.6(2)    | O(6)#1-Lu(1)-N(3)   | 76.5(2)   |
| O(8)#2-Lu(1)-N(3)   | 76.7(2)    | O(1W)-Lu(1)-N(3)    | 131.9(2)  |
| O(7)-Lu(1)-N(3)     | 141.0(2)   | O(2)#3-Lu(1)-N(3)   | 73.7(2)   |
| N(1)-Lu(1)-N(3)     | 131.0(2)   | N(2)-Lu(1)-N(3)     | 66.3(2)   |

#### Complex10

|                     |            |                     |            |
|---------------------|------------|---------------------|------------|
| Yb(1)-O(1W)         | 2.257(6)   | Yb(1)-O(1)          | 2.278(4)   |
| Yb(1)-O(2W)         | 2.280(5)   | Yb(1)-O(8)          | 2.327(5)   |
| Yb(1)-O(7)          | 2.375(4)   | Yb(1)-N(3)#1        | 2.440(6)   |
| Yb(1)-N(2)#1        | 2.465(5)   | Yb(1)-N(1)#1        | 2.487(5)   |
| Yb(1)-C(22)         | 2.695(7)   |                     |            |
| O(1W)-Yb(1)-O(1)    | 108.5(2)   | O(1W)-Yb(1)-O(2W)   | 74.8(2)    |
| O(1)-Yb(1)-O(2W)    | 81.21(16)  | O(1W)-Yb(1)-O(8)    | 155.0(2)   |
| O(1)-Yb(1)-O(8)     | 83.03(16)  | O(2W)-Yb(1)-O(8)    | 129.81(16) |
| O(1W)-Yb(1)-O(7)    | 147.6(2)   | O(1)-Yb(1)-O(7)     | 76.82(15)  |
| O(2W)-Yb(1)-O(7)    | 74.58(17)  | O(8)-Yb(1)-O(7)     | 55.46(16)  |
| O(1W)-Yb(1)-N(3)#1  | 89.0(2)    | O(1)-Yb(1)-N(3)#1   | 151.39(16) |
| O(2W)-Yb(1)-N(3)#1  | 81.83(17)  | O(8)-Yb(1)-N(3)#1   | 90.40(17)  |
| O(7)-Yb(1)-N(3)#1   | 76.55(17)  | O(1W)-Yb(1)-N(2)#1  | 80.2(2)    |
| O(1)-Yb(1)-N(2)#1   | 138.19(16) | O(2W)-Yb(1)-N(2)#1  | 138.99(16) |
| O(8)-Yb(1)-N(2)#1   | 76.84(16)  | O(7)-Yb(1)-N(2)#1   | 117.92(16) |
| N(3)#1-Yb(1)-N(2)#1 | 65.62(16)  | O(1W)-Yb(1)-N(1)#1  | 79.9(2)    |
| O(1)-Yb(1)-N(1)#1   | 75.61(16)  | O(2W)-Yb(1)-N(1)#1  | 137.92(17) |
| O(8)-Yb(1)-N(1)#1   | 81.75(17)  | O(7)-Yb(1)-N(1)#1   | 131.18(17) |
| N(3)#1-Yb(1)-N(1)#1 | 131.07(17) | N(2)#1-Yb(1)-N(1)#1 | 65.56(17)  |
| O(1W)-Yb(1)-C(22)   | 172.3(2)   | O(1)-Yb(1)-C(22)    | 77.34(17)  |
| O(2W)-Yb(1)-C(22)   | 101.68(19) | O(8)-Yb(1)-C(22)    | 28.18(17)  |
| O(7)-Yb(1)-C(22)    | 27.33(17)  | N(3)#1-Yb(1)-C(22)  | 83.77(19)  |
| N(2)#1-Yb(1)-C(22)  | 98.94(18)  | N(1)#1-Yb(1)-C(22)  | 106.75(19) |

#### Complex 11

|                     |            |                    |            |
|---------------------|------------|--------------------|------------|
| Lu(1)-O(1W)         | 2.243(4)   | Lu(1)-O(1)         | 2.267(3)   |
| Lu(1)-O(2W)         | 2.274(3)   | Lu(1)-O(8)         | 2.321(3)   |
| Lu(1)-O(7)          | 2.362(3)   | Lu(1)-N(3)#1       | 2.435(5)   |
| Lu(1)-N(2)#1        | 2.466(4)   | Lu(1)-N(1)#1       | 2.493(4)   |
| Lu(1)-C(22)         | 2.696(5)   |                    |            |
| O(1W)-Lu(1)-O(1)    | 107.21(14) | O(1W)-Lu(1)-O(2W)  | 74.74(14)  |
| O(1)-Lu(1)-O(2W)    | 81.07(12)  | O(1W)-Lu(1)-O(8)   | 154.78(15) |
| O(1)-Lu(1)-O(8)     | 83.53(12)  | O(2W)-Lu(1)-O(8)   | 130.19(13) |
| O(1W)-Lu(1)-O(7)    | 147.93(15) | O(1)-Lu(1)-O(7)    | 77.31(13)  |
| O(2W)-Lu(1)-O(7)    | 74.71(13)  | O(8)-Lu(1)-O(7)    | 55.72(12)  |
| O(1W)-Lu(1)-N(3)#1  | 89.47(16)  | O(1)-Lu(1)-N(3)#1  | 151.75(13) |
| O(2W)-Lu(1)-N(3)#1  | 81.63(13)  | O(8)-Lu(1)-N(3)#1  | 90.82(13)  |
| O(7)-Lu(1)-N(3)#1   | 76.67(14)  | O(1W)-Lu(1)-N(2)#1 | 80.31(14)  |
| O(1)-Lu(1)-N(2)#1   | 138.16(12) | O(2W)-Lu(1)-N(2)#1 | 138.92(13) |
| O(8)-Lu(1)-N(2)#1   | 76.84(12)  | O(7)-Lu(1)-N(2)#1  | 118.12(13) |
| N(3)#1-Lu(1)-N(2)#1 | 65.86(13)  | O(1W)-Lu(1)-N(1)#1 | 79.06(15)  |

|                     |            |                     |            |
|---------------------|------------|---------------------|------------|
| O(1)-Lu(1)-N(1)#1   | 75.29(12)  | O(2W)-Lu(1)-N(1)#1  | 137.37(13) |
| O(8)-Lu(1)-N(1)#1   | 81.91(13)  | O(7)-Lu(1)-N(1)#1   | 131.48(13) |
| N(3)#1-Lu(1)-N(1)#1 | 131.40(13) | N(2)#1-Lu(1)-N(1)#1 | 65.69(13)  |
| O(1W)-Lu(1)-C(22)   | 173.18(16) | O(1)-Lu(1)-C(22)    | 77.94(13)  |
| O(2W)-Lu(1)-C(22)   | 102.08(15) | O(8)-Lu(1)-C(22)    | 28.17(14)  |
| O(7)-Lu(1)-C(22)    | 27.61(14)  | N(3)#1-Lu(1)-C(22)  | 84.06(14)  |
| N(2)#1-Lu(1)-C(22)  | 98.92(14)  | N(1)#1-Lu(1)-C(22)  | 106.88(14) |

#### Complex 12

|                     |            |                     |            |
|---------------------|------------|---------------------|------------|
| Dy(1)-O(7)#1        | 2.259(5)   | Dy(1)-O(8)          | 2.285(5)   |
| Dy(1)-O(2)          | 2.318(5)   | Dy(1)-O(6)#2        | 2.362(5)   |
| Dy(1)-O(5)#3        | 2.413(5)   | Dy(1)-N(2)#4        | 2.498(6)   |
| Dy(1)-N(1)#4        | 2.549(6)   | Dy(1)-N(3)#4        | 2.553(6)   |
| O(7)#1-Dy(1)-O(8)   | 114.3(2)   | O(7)#1-Dy(1)-O(2)   | 89.11(18)  |
| O(8)-Dy(1)-O(2)     | 139.26(19) | O(7)#1-Dy(1)-O(6)#2 | 76.53(19)  |
| O(8)-Dy(1)-O(6)#2   | 75.4(2)    | O(2)-Dy(1)-O(6)#2   | 78.68(19)  |
| O(7)#1-Dy(1)-O(5)#3 | 77.68(19)  | O(8)-Dy(1)-O(5)#3   | 70.3(2)    |
| O(2)-Dy(1)-O(5)#3   | 150.2(2)   | O(6)#2-Dy(1)-O(5)#3 | 122.70(19) |
| O(7)#1-Dy(1)-N(2)#4 | 139.8(2)   | O(8)-Dy(1)-N(2)#4   | 87.9(2)    |
| O(2)-Dy(1)-N(2)#4   | 94.77(19)  | O(6)#2-Dy(1)-N(2)#4 | 143.40(19) |
| O(5)#3-Dy(1)-N(2)#4 | 79.46(18)  | O(7)#1-Dy(1)-N(1)#4 | 154.2(2)   |
| O(8)-Dy(1)-N(1)#4   | 69.9(2)    | O(2)-Dy(1)-N(1)#4   | 75.22(19)  |
| O(6)#2-Dy(1)-N(1)#4 | 80.37(19)  | O(5)#3-Dy(1)-N(1)#4 | 125.29(19) |
| N(2)#4-Dy(1)-N(1)#4 | 63.24(19)  | O(7)#1-Dy(1)-N(3)#4 | 78.0(2)    |
| O(8)-Dy(1)-N(3)#4   | 134.6(2)   | O(2)-Dy(1)-N(3)#4   | 80.8(2)    |
| O(6)#2-Dy(1)-N(3)#4 | 147.3(2)   | O(5)#3-Dy(1)-N(3)#4 | 70.4(2)    |
| N(2)#4-Dy(1)-N(3)#4 | 63.34(19)  | N(1)#4-Dy(1)-N(3)#4 | 118.3(2)   |

#### Complex 13

|                     |            |                     |            |
|---------------------|------------|---------------------|------------|
| Er(1)-O(7)#1        | 2.242(3)   | Er(1)-O(8)          | 2.267(3)   |
| Er(1)-O(2)          | 2.306(3)   | Er(1)-O(6)#2        | 2.336(4)   |
| Er(1)-O(5)#3        | 2.396(3)   | Er(1)-N(2)#4        | 2.461(4)   |
| Er(1)-N(1)#4        | 2.543(4)   | Er(1)-N(3)#4        | 2.544(4)   |
| O(7)#1-Er(1)-O(8)   | 114.28(13) | O(7)#1-Er(1)-O(2)   | 89.21(13)  |
| O(8)-Er(1)-O(2)     | 139.22(13) | O(7)#1-Er(1)-O(6)#2 | 76.33(13)  |
| O(8)-Er(1)-O(6)#2   | 75.60(14)  | O(2)-Er(1)-O(6)#2   | 78.68(13)  |
| O(7)#1-Er(1)-O(5)#3 | 77.96(13)  | O(8)-Er(1)-O(5)#3   | 70.33(13)  |
| O(2)-Er(1)-O(5)#3   | 150.04(13) | O(6)#2-Er(1)-O(5)#3 | 123.04(12) |
| O(7)#1-Er(1)-N(2)#4 | 139.97(14) | O(8)-Er(1)-N(2)#4   | 87.73(14)  |
| O(2)-Er(1)-N(2)#4   | 94.74(13)  | O(6)#2-Er(1)-N(2)#4 | 143.47(13) |
| O(5)#3-Er(1)-N(2)#4 | 79.09(13)  | O(7)#1-Er(1)-N(1)#4 | 153.26(14) |
| O(8)-Er(1)-N(1)#4   | 69.99(13)  | O(2)-Er(1)-N(1)#4   | 74.67(13)  |
| O(6)#2-Er(1)-N(1)#4 | 79.62(13)  | O(5)#3-Er(1)-N(1)#4 | 125.86(13) |
| N(2)#4-Er(1)-N(1)#4 | 64.08(13)  | O(7)#1-Er(1)-N(3)#4 | 77.91(13)  |
| O(8)-Er(1)-N(3)#4   | 134.36(14) | O(2)-Er(1)-N(3)#4   | 81.02(13)  |
| O(6)#2-Er(1)-N(3)#4 | 147.20(14) | O(5)#3-Er(1)-N(3)#4 | 69.92(13)  |
| N(2)#4-Er(1)-N(3)#4 | 63.53(14)  | N(1)#4-Er(1)-N(3)#4 | 119.17(13) |

<sup>a</sup>Symmetry transformations used to generate equivalent atoms: #1  $-x + 1, -y, -z + 1$ , #2  $-x + 2, y, -z + 3/2$  for complex **1**; #1  $-x + 1/2, -y + 1/2, -z$ , #2  $-x + 1/2, -y + 1/2, -z + 1$ , #3  $x, y, z + 1$ , #4  $-x, y, -z - 1/2$ , #5  $x, y, z - 1$  for complexes **2-7**; #1  $x, y, z + 1$ , #2  $-x, -y + 2, -z$ , #3  $x, -y + 3/2, z + 1/2$ , #4  $x, y, z - 1$ , #5  $x, -y + 3/2, z - 1/2$  for complex **8-9**; #1  $-x + 5/2, y - 1/2, -z + 3/2$ , #2  $-x + 5/2, y + 1/2, -z + 3/2$ , #3  $-x + 2, y, -z + 3/2$  for complex **10-11**; #1  $-x, -y + 1, -z$ , #2  $-x, -y, -z$ , #3  $x, y + 1, z$ , #4  $-x, -y + 1, -z + 1$ , #5  $x, y - 1, z$ , #6  $-x - 1, -y + 1, -z$  for complex **12-13**.

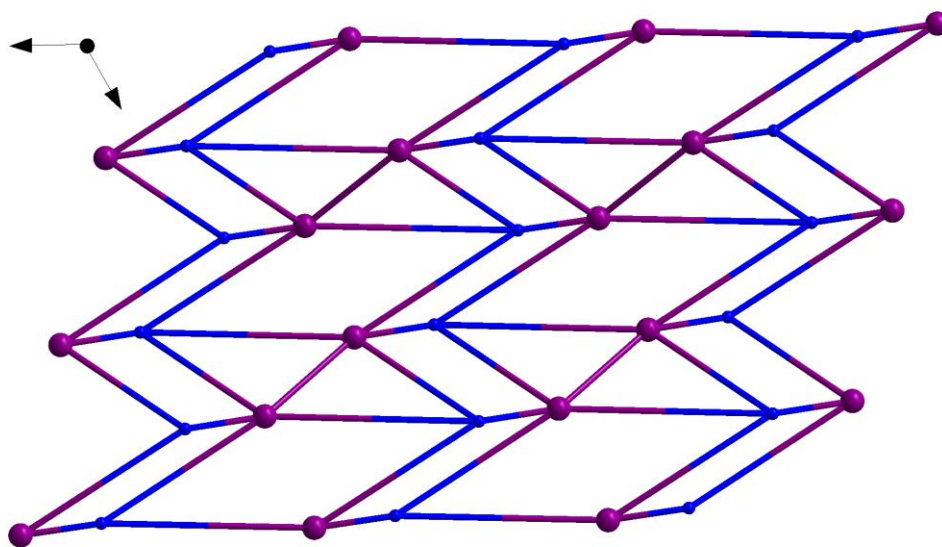

**Figure S1.** The topology of complex **7** (the purple balls represent for Lu(III) ions and blue balls represent for BSPT<sup>2-</sup> ligands).

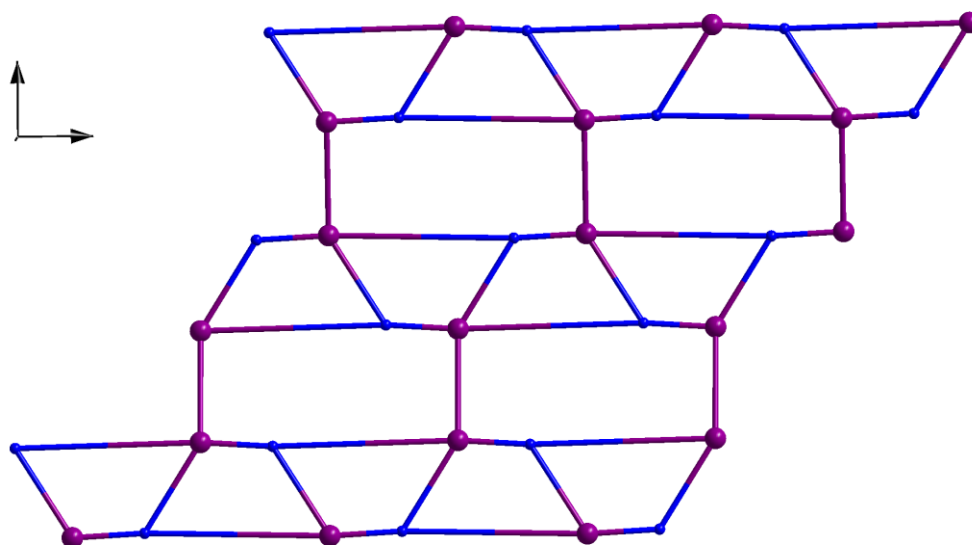

**Figure S2.** The topology of complex **9** (the purple balls represent for Lu(III) ions and blue balls represent for BSPT<sup>2-</sup> ligands).



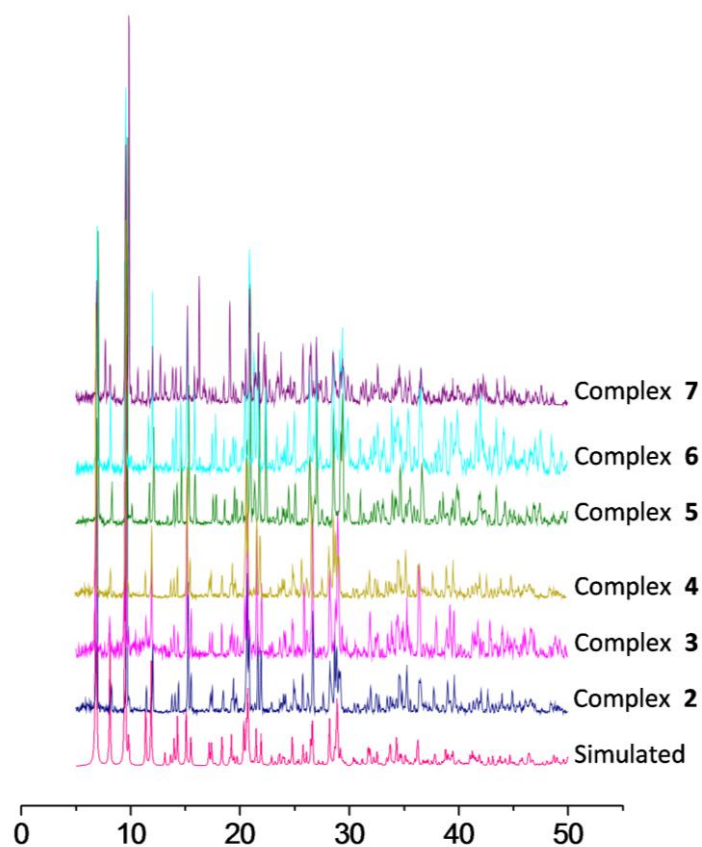

**Figure S3.** PXRD patterns of simulated based on the X-ray single-crystal diffraction data of **2** and for as-synthesized **2-7**.

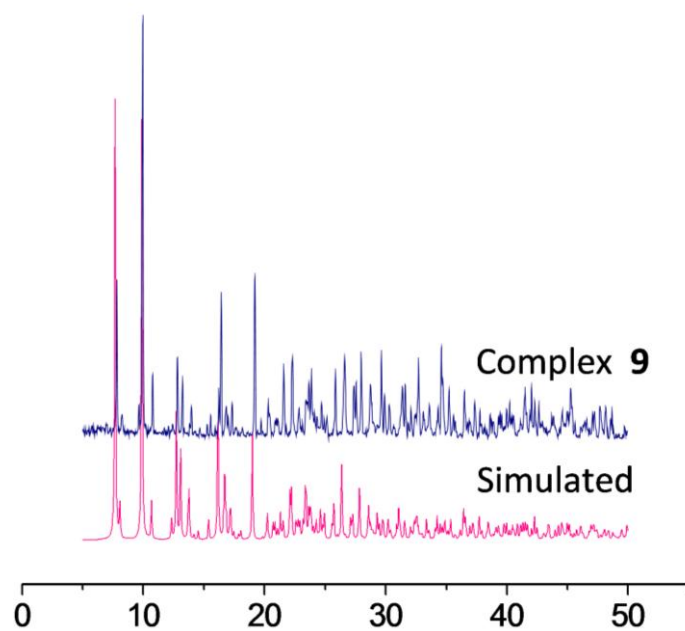

**Figure S4.** PXRD patterns of simulated based on the X-ray single-crystal diffraction data of **9** and for as-synthesized **9**.

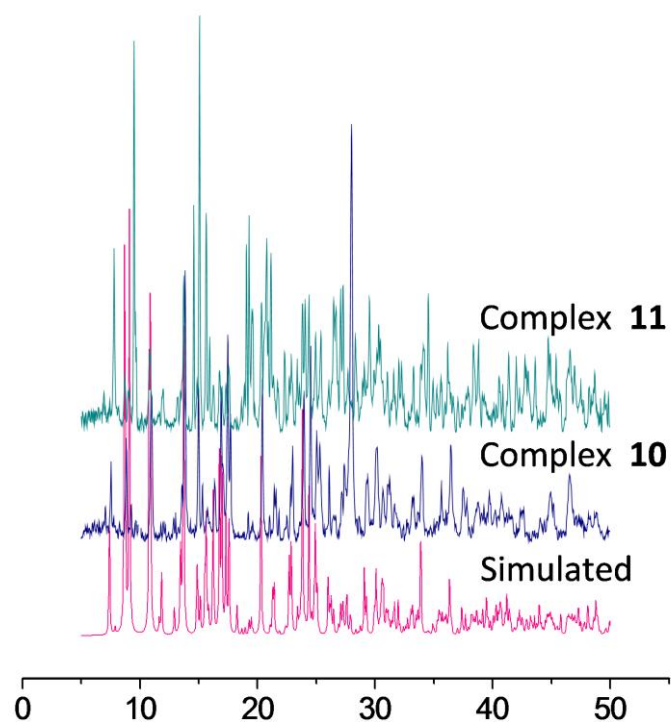

**Figure S5.** PXR D patterns of simulated based on the X-ray single-crystal diffraction data of **10** and for as-synthesized **10-11**.

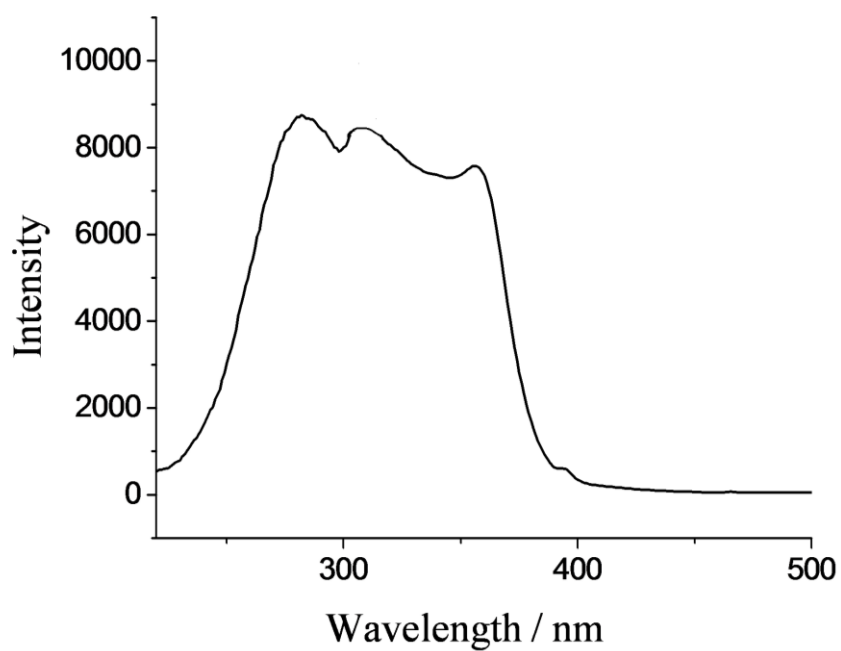

**Figure S6.** Solid-state excitation spectrum for **3** in the solid state at room temperature.

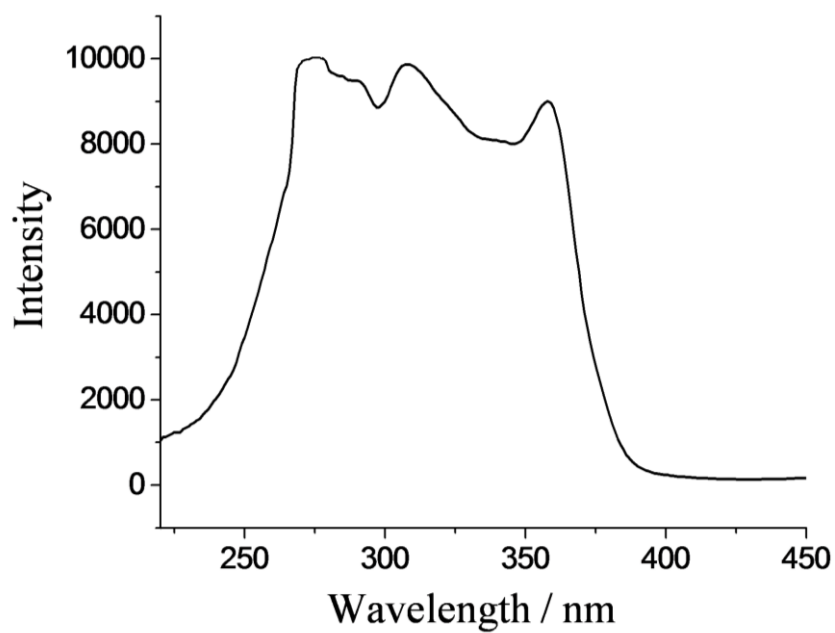

**Figure S7.** Solid-state excitation spectrum for **4** in the solid state at room temperature.
